# Supplementary material for: Synthesis and luminescence properties of new nitridolithosilicate phosphor La4Ba3Li3Si9N19:Pr3+ grown in Li flux
Source: Royal Society of Chemistry journal article supplement (doi:10.1039/d2cc00211f), 2022-01-01
Supplement: d2cc00211f1.pdf [file d2cc00211f1.pdf]

## Synthesis and luminescence properties of new nitridolithosilicate phosphor

### La<sub>4</sub>Ba<sub>3</sub>Li<sub>3</sub>Si<sub>9</sub>N<sub>19</sub>: Pr<sup>3+</sup> grown in Li flux

Rui-Xin Li,<sup>a</sup> Xiao-Ming Wang,<sup>\*a</sup> Shi-Rui Zhang,<sup>a</sup> Xue Gu,<sup>a</sup> Zu-Pei Yang,<sup>b</sup> and Huan Jiao<sup>\*a</sup>

#### Electronic Supplementary Information (ESI):

##### Materials and synthesis.

Based on the sensitivity of the starting materials to oxygen and moisture, all experimental operations were performed under a glovebox filled with argon conditions (Beijing Mikrouna, O<sub>2</sub> < 1 ppm, H<sub>2</sub>O < 1 ppm). The single crystals of La<sub>4</sub>Ba<sub>3</sub>Li<sub>3</sub>Si<sub>9</sub>N<sub>19</sub> were synthesized from Li<sub>3</sub>N (0.48 mmol, Hebei LiFu, 99.9%), LaN (1.50 mmol, Yantai Xierde, 99%), Ba<sub>3</sub>N<sub>2</sub> (0.50 mmol), α-Si<sub>3</sub>N<sub>4</sub> (1.65 mmol, Alfa Aesar, 99.9%) · 15mmol Li was added as flux. The powder reactants were ground for 30 minutes and placed in a tantalum ampule (wall thickness 0.5 mm, internal diameter 10 mm, length 150 mm), which was arc-welded under a pressure of 1 bar purified argon. The reaction mixture then heated to 1400°C within 2h, maintained for 20h, finally cooled down to 1000°C and quenched to room temperature. Powder samples of La<sub>4</sub>Ba<sub>3</sub>Li<sub>3</sub>Si<sub>9</sub>N<sub>19</sub> were synthesized from Li (12 mmol), Li<sub>3</sub>N (0.40 mmol, Hebei LiFu, 99.9%), LaN (1.50 mmol, Yantai Xierde, 99%), Ba<sub>3</sub>N<sub>2</sub> (0.38 mmol, Yantai Xierde, 99%), α-Si<sub>3</sub>N<sub>4</sub> (1.08 mmol, Alfa Aesar, 99.9%) and PrN (Alfa Aesar, 99.9%) was added as an activator. Raw materials were mixed in an agate mortar and then filled into tungsten crucibles, then the crucibles were positioned in the middle of a tube furnace under a reductive atmosphere of 6:94 (volume) H<sub>2</sub>/N<sub>2</sub> and heated to 1550°C within 2 h. After being maintained at 1550°C for 6h, the furnace was cooled down to 1000°C for 3h and finally cooled to room temperature by switching off the furnace. The body colors of the host sample and Pr<sup>3+</sup> doped samples are both light yellow.

##### Characterization

**Single-Crystal X-ray Diffraction.** The single crystals of La<sub>4</sub>Ba<sub>3</sub>Li<sub>3</sub>Si<sub>9</sub>N<sub>19</sub> were isolated from the powder samples and mounted on a 50 μm CryoLoop (Hampton). Single-Crystal X-ray diffraction data were collected on Rigaku diffraction (XtaLAB Synergy-R) with a rotating anode X-ray source (Cu Kα radiation). The crystal structure of La<sub>4</sub>Ba<sub>3</sub>Li<sub>3</sub>Si<sub>9</sub>N<sub>19</sub> was solved by direct methods (SHELXT)<sup>1</sup> and refined by full-matrix least-squares methods (SHELXL)<sup>2</sup>. All the atom sites were refined with anisotropic displacement parameters. Further details of La<sub>4</sub>Ba<sub>3</sub>Li<sub>3</sub>Si<sub>9</sub>N<sub>19</sub> crystal structure investigation can be available from the Cambridge Crystallographic Data Centre (CCDC) on quoting the depository number CCDC code 2119741.

**Powder X-ray Diffraction (PXRD).** PXRD data were collected using a Cu source from a Rigaku

MiniFlex600 diffractometer (Japan). The data were recorded over a  $2\theta$  range from  $5^\circ$  to  $120^\circ$  at intervals of  $0.01^\circ$  and a total data collection time of 2 h. Rietveld refinements on PXRD data were carried out by Topas 5.0 software<sup>3,4</sup>.

**Scanning Electron Microscopy (SEM).** To determine the morphology and chemical analysis of the compound, SEM (Philips-FEI Quanta 25) and an attached energy dispersive X-ray spectrometer (EDAX, Element System) were used with TEAM software. The product particle was marginally placed on an adhesive conductive carbon pad.

**Transmission Electron Microscopy (TEM).** TEM was used to examine fine details of the samples' morphology utilizing a Thermo Fisher Scientific Talos F200i field emission TEM. The sample was prepared by evaporation in the air of a droplet of the powders dispersed in absolute alcohol onto ultra-thin carbon films supported on copper TEM grids.

**UV/vis Spectroscopy.** The ultraviolet–visible (UV–vis) diffuse reflectance (DR) spectra were measured on a Lambda 1050 UV-vis-NIR spectrophotometer (Perkin-Elmer), while the white powder  $\text{BaSO}_4$  was used as a standard material. Converting the measured reflectance spectrum to a pseudo-absorption spectrum was achieved by using the Kubelka–Munk function<sup>5</sup>:

$$[F(R_\infty)] = \frac{(1 - R)^2}{2R}$$

(with R being the reflectance). The values of  $[F(R_\infty h\nu)]^n$  with  $n = 1/2$  for an indirect allowed transition are plotted as a function of the incident photon energy ( $h\nu$ ).

**Density Functional Theory.** All calculations were performed with the Cambridge Serial Total Energy Package (CASTEP) code, in which the plane-wave basis set was chosen for the expansion of valance–electron wave functions at the local density approximation (LDA) level. The crystal structure was optimized by using the Broyden-Fletcher-Goldfarb-Shannon (BFGS) method. Structural relaxations of the unit cells of  $\text{La}_4\text{Ba}_3\text{Li}_3\text{Si}_9\text{N}_{19}$  were done with a convergence criteria of  $1.0 \times 10^{-7}$  eV/atom for total energies. The energy cutoff of plane wave basis was set to 340 eV and  $\Gamma$ -centered  $k$ -meshes ( $4 \times 4 \times 2$ ) produced from the method of Monkhorst-Pack grid (separation  $\sim 0.04 \text{ \AA}^{-1}$ ) were used for sampling the Brillouin zone. Band structure calculations were performed on the basis of the primitive cell. Furthermore, the co-occupied (La2, La3) and half occupied (Si1, Li1, N10) were separated by reducing the space group symmetry to  $P1$  (No.1) for avoiding calculation error.

**Luminescence.** The photoluminescence (PL) and photoluminescence excitation (PLE) spectra were measured at room temperature using a Hitachi F-7000 fluorescent spectrophotometer (Japan) with a 150 W Xe lamp as the excitation source. The spectrum correction was applied and color

coordinates were calculated by using the spectra data. High temperature-dependent PL spectra of  $\text{La}_{3.99}\text{Ba}_3\text{Li}_3\text{Si}_9\text{N}_{19}: 0.01\text{Pr}^{3+}$  were investigated between 300K and 500K using a TAP-02 high-temperature fluorescence attachment. In order to evaluate the thermal stability of the material more intuitively through the data, the Arrhenius equation can be used<sup>6</sup>:

$$\frac{I_T}{I_0} = [1 + D \exp(-\frac{E_a}{KT})]^{-1}$$

where  $I_{(0, T)}$  stands for the emission intensity at initial temperature and the temperature monitoring,  $D$  means a constant and  $K = 8.617 \times 10^{-5} \text{ eV K}^{-1}$  (Boltzmann constant),  $E_a$  is the activation energy. The decay curves were analyzed by fluorescence spectrophotometer with a 150 W microsecond pulsed lamp as the excitation source on the Edinburgh FLS1000 fluorescence spectrophotometer. The curve of the  $\text{Pr}^{3+}$  activated phosphor can be well fitted by a second-order exponential function<sup>7, 8</sup>:

$$I(t) = I_0 + A_1 \exp\left(-\frac{t}{\tau_1}\right) + A_2 \exp\left(-\frac{t}{\tau_2}\right) \quad (1)$$

$$\tau_{ave} = (A_1 \tau_1^2 + A_2 \tau_2^2) / (A_1 \tau_1 + A_2 \tau_2) \quad (2)$$

where  $I(t)$  stands for the emission intensity at the temperature monitoring,  $I_0$  means the background intensity,  $A_1$  and  $A_2$  are the fitting constants,  $\tau_1$ ,  $\tau_2$  and  $\tau_{ave}$  refers to the short, long and average lifetime respectively.

## Table of Contents

|                                                                                                                                                                                                                         |    |
|-------------------------------------------------------------------------------------------------------------------------------------------------------------------------------------------------------------------------|----|
| Table S1. Atomic coordinates, Wyckoff positions, equivalent displacement parameters, and site occupancies of $\text{La}_4\text{Ba}_3\text{Li}_3\text{Si}_9\text{N}_{19}$ . .....                                        | 5  |
| Table S2. Anisotropic displacement parameters ( $U_{ij}$ in $\text{\AA}^2$ ) of $\text{La}_4\text{Ba}_3\text{Li}_3\text{Si}_9\text{N}_{19}$ with standard deviations in parentheses. ....                               | 6  |
| Table S3. Selected bond lengths and angles of $\text{La}_4\text{Ba}_3\text{Li}_3\text{Si}_9\text{N}_{19}$ . ....                                                                                                        | 7  |
| Table S4. The Rietveld refinement of $\text{La}_4\text{Ba}_3\text{Li}_3\text{Si}_9\text{N}_{19}$ powder XRD data. ....                                                                                                  | 8  |
| Table S5. Results in atom% from 10 EDX point-measurements of $\text{La}_4\text{Ba}_3\text{Li}_3\text{Si}_9\text{N}_{19}$ . ....                                                                                         | 9  |
| Fig. S1 The XRD patterns of $\text{Eu}^{2+}$ , $\text{Ce}^{3+}$ and $\text{Pr}^{3+}$ doped $\text{La}_4\text{Ba}_3\text{Li}_3\text{Si}_9\text{N}_{19}$ . ....                                                           | 10 |
| Fig. S2 The pictures of $\text{Eu}^{2+}$ , $\text{Ce}^{3+}$ and $\text{Pr}^{3+}$ doped $\text{La}_4\text{Ba}_3\text{Li}_3\text{Si}_9\text{N}_{19}$ powder samples under daylight (a) and 365 nm UV excitation (b). .... | 10 |
| Fig. S3 The quantum efficiency (QE) of $\text{La}_{3.99}\text{Ba}_3\text{Li}_3\text{Si}_9\text{N}_{19}$ : $0.01\text{Pr}^{3+}$ phosphor. ....                                                                           | 11 |
| Reference .....                                                                                                                                                                                                         | 11 |

**Table S1.** Atomic coordinates, Wyckoff positions, equivalent displacement parameters, and site occupancies of  $\text{La}_4\text{Ba}_3\text{Li}_3\text{Si}_9\text{N}_{19}$ .

| Atom | Wyck. | x         | y         | z          | S.o.f. | $U_{\text{eq}}/\text{\AA}^2$ |
|------|-------|-----------|-----------|------------|--------|------------------------------|
| Ba1  | 4c    | 1         | 0.6011(4) | 0.75       | 1.0    | 0.0051(1)                    |
| Ba2  | 8f    | 1         | 0.1733(3) | 0.5220(6)  | 1.0    | 0.0180(1)                    |
| La1  | 8e    | 0.7267(6) | 0.50      | 0.50       | 1.0    | 0.0245(1)                    |
| La2  | 8g    | 0.7068(5) | 0.3080(3) | 0.75       | 0.2    | 0.0196(1)                    |
| La3  | 8g    | 0.7265(1) | 0.2791(1) | 0.75       | 0.8    | 0.0123(3)                    |
| Li1  | 8f    | 0.50      | 0.6007(1) | 0.1230(3)  | 0.5    | 0.0102(1)                    |
| Li2  | 8g    | 0.2024(1) | 0.5650(9) | 0.25       | 1.0    | 0.0140(3)                    |
| Si1  | 8f    | 0.50      | 0.5462(2) | 0.2231(3)  | 0.5    | 0.0063(4)                    |
| Si2  | 8g    | 0.3418(2) | 0.4050(1) | 0.25       | 1.0    | 0.0063(4)                    |
| Si3  | 16h   | 0.1610(1) | 0.3293(8) | 0.0255(1)  | 1.0    | 0.0056(3)                    |
| Si4  | 8f    | 0         | 0.4322(1) | -0.1105(2) | 1.0    | 0.0056(4)                    |
| N1   | 8f    | 0         | 0.3057(4) | 0.0817(7)  | 1.0    | 0.0076(1)                    |
| N2   | 8d    | 0.25      | 0.25      | 0          | 1.0    | 0.0102(1)                    |
| N3   | 4c    | 0.50      | 0.3609(6) | 0.25       | 1.0    | 0.0080(9)                    |
| N4   | 16h   | 0.2483(5) | 0.3801(3) | 0.1272(4)  | 1.0    | 0.0080(9)                    |
| N5   | 8g    | 0.3554(8) | 0.4986(4) | 0.25       | 1.0    | 0.0160(1)                    |
| N6   | 16h   | 0.1494(5) | 0.3822(3) | -0.0996(5) | 1.0    | 0.0083(1)                    |
| N7   | 4b    | 0         | 0.50      | 0          | 1.0    | 0.0110(2)                    |
| N8   | 4c    | 0         | 0.4729(5) | -0.25      | 1.0    | 0.0051(1)                    |
| N9   | 4c    | 0.50      | 0.6322(7) | 0.25       | 1.0    | 0.0290(3)                    |
| N10  | 8f    | 0.50      | 0.5469(1) | 0.0621(1)  | 0.5    | 0.0196(1)                    |

**Table S2.** Anisotropic displacement parameters ( $U_{ij}$  in  $\text{\AA}^2$ ) of  $\text{La}_4\text{Ba}_3\text{Li}_3\text{Si}_9\text{N}_{19}$  with standard deviations in parentheses.

| Atom | $U^{11}$ | $U^{22}$ | $U^{33}$ | $U^{12}$  | $U^{13}$  | $U^{23}$  |
|------|----------|----------|----------|-----------|-----------|-----------|
| Ba1  | 0.004(1) | 0.004(3) | 0.006(1) | 0.000(3)  | 0.000(7)  | 0.000(6)  |
| Ba2  | 0.004(1) | 0.016(3) | 0.032(4) | 0.000(5)  | 0.000(1)  | 0.016(2)  |
| La1  | 0.008(3) | 0.014(2) | 0.050(4) | 0.000     | 0.000(5)  | -0.016(3) |
| La2  | 0.008(1) | 0.044(3) | 0.006(2) | 0.006(2)  | 0.000(1)  | 0.000(1)  |
| La3  | 0.014(1) | 0.017(5) | 0.005(2) | -0.005(1) | 0.000(1)  | 0.000(1)  |
| Li1  | 0.008(3) | 0.011(3) | 0.012(3) | 0.003(3)  | 0.004(3)  | 0.005(3)  |
| Li2  | 0.023(9) | 0.012(7) | 0.006(7) | 0.002(7)  | 0.000(1)  | 0.000(1)  |
| Si1  | 0.005(1) | 0.007(2) | 0.006(2) | -0.001(3) | 0.000(5)  | 0.000(3)  |
| Si2  | 0.005(1) | 0.007(1) | 0.006(2) | -0.001(3) | 0.000(1)  | 0.000(6)  |
| Si3  | 0.004(1) | 0.005(1) | 0.006(3) | 0.001(5)  | -0.001(4) | 0.001(2)  |
| Si4  | 0.005(1) | 0.006(2) | 0.004(3) | 0.000(6)  | 0.000(1)  | 0.001(8)  |
| N1   | 0.006(2) | 0.008(3) | 0.009(3) | 0.000(1)  | 0.000(6)  | 0.003(3)  |
| N2   | 0.008(1) | 0.011(3) | 0.012(3) | 0.003(3)  | 0.004(3)  | 0.005(3)  |
| N3   | 0.005(2) | 0.010(2) | 0.009(2) | 0.000(5)  | 0.000(5)  | 0.000(1)  |
| N4   | 0.005(2) | 0.010(2) | 0.009(2) | 0.000(7)  | 0.000(1)  | 0.000(5)  |
| N5   | 0.007(4) | 0.008(3) | 0.033(5) | 0.001(3)  | 0.000(6)  | 0.000(1)  |
| N6   | 0.007(2) | 0.007(2) | 0.011(2) | 0.001(6)  | 0.001(2)  | 0.001(8)  |
| N7   | 0.011(5) | 0.009(5) | 0.013(5) | 0.000(6)  | 0.000(1)  | -0.002(4) |
| N8   | 0.004(4) | 0.004(4) | 0.008(5) | 0.000(3)  | 0.000(3)  | 0.000(3)  |
| N9   | 0.017(6) | 0.011(6) | 0.059(8) | 0.000(5)  | 0.000(7)  | 0.000(5)  |
| N10  | 0.008(2) | 0.044(3) | 0.006(3) | 0.006(2)  | 0.000(6)  | 0.000(3)  |

**Table S3.** Selected bond lengths and angles of La<sub>4</sub>Ba<sub>3</sub>Li<sub>3</sub>Si<sub>9</sub>N<sub>19</sub>.

| <b>Bond</b> | <b>length(Å)</b>  | <b>Bond</b> | <b>length(Å)</b>  |
|-------------|-------------------|-------------|-------------------|
| Si4—N8      | 1.742 (5)         | N5—Li2      | 1.920 (6)         |
| Si4—N6      | 1.722 (5)         | N5—Si1      | 1.681 (8)         |
| Si4—N7      | 1.758 (2)         | N9—Si1      | 1.602 (6)         |
| Si2—N3      | 1.737 (5)         | N9—Li1      | 1.540 (3)         |
| Si2—N4      | 1.719 (5)         | Si1—N10     | 1.818 (4)         |
| Si2—N5      | 1.716 (8)         | N6—Li2      | 2.021 (7)         |
| Si3—N6      | 1.715 (5)         | N10—Li1     | 1.200 (4)         |
| Si3—N2      | 1.712 (6)         | Si3—N1      | 1.744 (4)         |
| Si3—N4      | 1.703 (5)         | N8—Li2      | 2.087 (3)         |
| <b>Bond</b> | <b>Angle(deg)</b> | <b>Bond</b> | <b>Angle(deg)</b> |
| N8—Si4—N7   | 109.9 (3)         | Li1—N9—Si1  | 57.2 (2)          |
| N6—Si4—N8   | 106.9 (2)         | N9—Si1—N5   | 118.2 (3)         |
| N6—Si4—N7   | 108.8 (5)         | N9—Si1—N10  | 100.5 (7)         |
| N4—Si2—N3   | 110.2 (2)         | Li1—N10—Si1 | 55.4 (3)          |
| N5—Si2—N3   | 113.2 (4)         | N5—Si1—N10  | 100.6 (4)         |
| N5—Si2—N4   | 107.7 (2)         | Si3—N4—Si2  | 162.0 (3)         |
| N6—Si3—N1   | 112.3 (3)         | Si1—N5—Si2  | 125.5 (5)         |
| N2—Si3—N6   | 111.7 (5)         | Si1—N5—Li2  | 108.8 (6)         |
| N2—Si3—N1   | 107.8 (2)         | N10—Li1—N9  | 147.0 (3)         |
| N4—Si3—N6   | 106.3 (3)         | N4—Si3—N2   | 108.8 (4)         |

**Table S4.** The Rietveld refinement of  $\text{La}_4\text{Ba}_3\text{Li}_3\text{Si}_9\text{N}_{19}$  powder XRD data.

|                               |                                                             |
|-------------------------------|-------------------------------------------------------------|
| Chemical formula              | $\text{La}_4\text{Ba}_3\text{Li}_3\text{Si}_9\text{N}_{19}$ |
| Crystal system                | Orthorhombic                                                |
| Space group                   | <i>Cmcm</i> (No.63)                                         |
| <i>a</i> (Å)                  | 9.73642 (19)                                                |
| <i>b</i> (Å)                  | 18.2991 (4)                                                 |
| <i>c</i> (Å)                  | 11.3100 (2)                                                 |
| Cell volume (Å <sup>3</sup> ) | 2015.08 (2)                                                 |
| Z                             | 4                                                           |
| Radiation                     | Cu K $\alpha$                                               |
| Diffractometer                | Rigaku MiniFlex 600                                         |
| Structure refinement          | Topas 5                                                     |
| Temperature (K)               | 297                                                         |
| 2 $\theta$ range (°)          | 5 - 120                                                     |
| Step size (°)                 | 0.01                                                        |
| Profile function              | PVII                                                        |
| $R_p$                         | 5.70                                                        |
| $R_{wp}$                      | 7.49                                                        |
| $R_{exp}$                     | 4.08                                                        |
| GOF                           | 1.84                                                        |



**Table S5.** Results in atom% from 10 EDX point-measurements of  $\text{La}_4\text{Ba}_3\text{Li}_3\text{Si}_9\text{N}_{19}$ .

| Measurement | La    | Ba   | Si    | N     |
|-------------|-------|------|-------|-------|
| 1           | 10.10 | 7.89 | 21.85 | 60.16 |
| 2           | 8.51  | 6.60 | 19.73 | 65.17 |
| 3           | 9.85  | 7.84 | 21.99 | 60.32 |
| 4           | 8.76  | 6.90 | 20.28 | 64.06 |
| 5           | 8.17  | 6.12 | 19.46 | 66.25 |
| 6           | 8.49  | 6.98 | 19.84 | 64.69 |
| 7           | 9.81  | 7.43 | 21.58 | 61.18 |
| 8           | 9.82  | 7.60 | 22.38 | 60.20 |
| 9           | 8.06  | 6.20 | 19.26 | 66.48 |
| 10          | 8.90  | 7.03 | 20.47 | 63.60 |
| Average     | 9.04  | 7.06 | 20.68 | 63.21 |

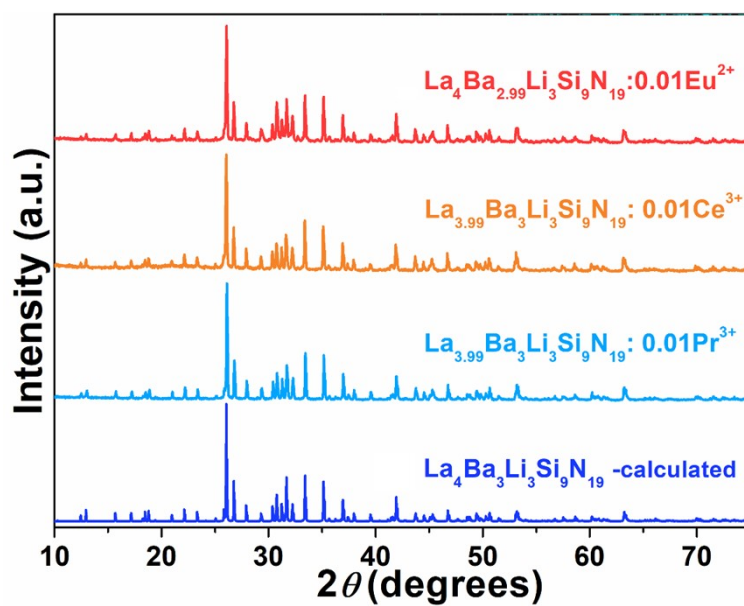

**Fig. S1** The XRD patterns of  $\text{Eu}^{2+}$ ,  $\text{Ce}^{3+}$  and  $\text{Pr}^{3+}$  doped  $\text{La}_4\text{Ba}_3\text{Li}_3\text{Si}_9\text{N}_{19}$ .

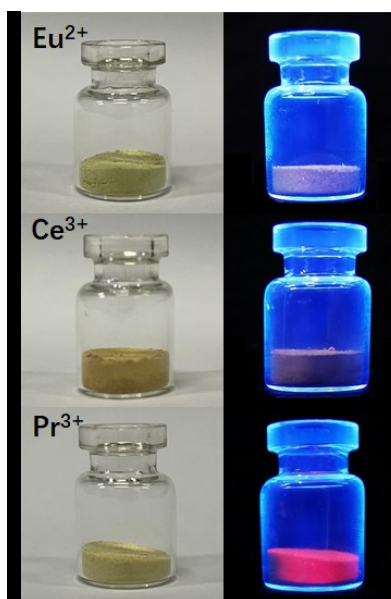

**Fig. S2** The pictures of  $\text{Eu}^{2+}$ ,  $\text{Ce}^{3+}$  and  $\text{Pr}^{3+}$  doped  $\text{La}_4\text{Ba}_3\text{Li}_3\text{Si}_9\text{N}_{19}$  powder samples under daylight (a) and 365 nm UV excitation (b).

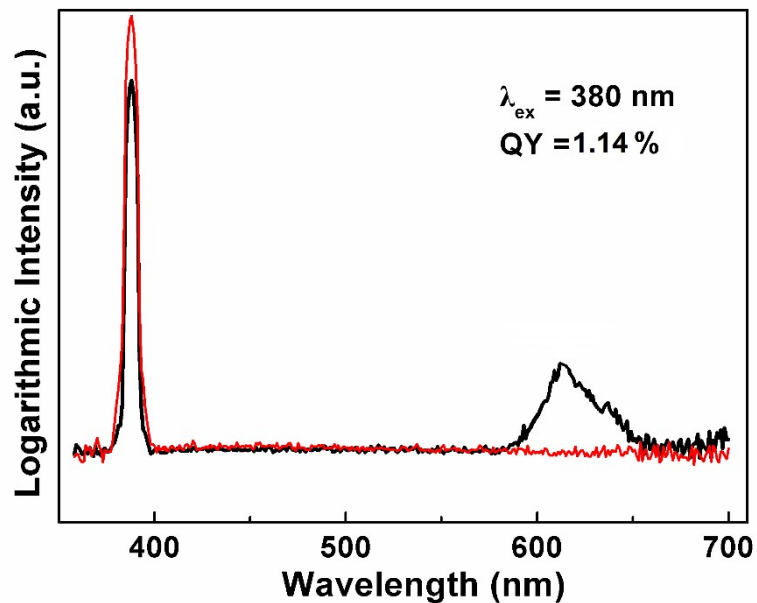

**Fig. S3** The quantum efficiency (QE) of  $\text{La}_{3.99}\text{Ba}_3\text{Li}_3\text{Si}_9\text{N}_{19}:0.01\text{Pr}^{3+}$  phosphor.

#### Reference

1. G. M. Sheldrick, *Acta Cryst.*, 2015, **A71**, 3-8.
2. G. M. Sheldrick, *Acta Cryst.*, 2008, **A64**, 112-122.
3. R. W. Cheary, A. A. Coelho, J. P. Cline, *Res. Natl. Inst. Stand. Technol*, 2004, 109, 1-25.
4. B. H. M. RIETVELD, *J. Appl. Cryst.*, 1969, **2**, 65-71.
5. R. López and R. Gómez, *J Sol-Gel Sci Technol*, 2012, **61**, 1-7.
6. Y. Li, Q. Wu, X. Wang, J. Ding, Q. Long and Y. Wang, *RSC Adv.*, 2014, **4**, 63569-63575.
7. C. Ji, T.-H. Huang, Z. Huang, J. Wen, W. Xie, X. Tian, T. Wu, H. He and Y. Peng, *J. Lumin.*, 2019, **216**.
8. C. Ji, Z. Huang, J. Wen, J. Zhang, X. Tian, H. He, L. Zhang, T.-H. Huang, W. Xie and Y. Peng, *J. Alloy. Compd.*, 2019, **788**, 1127-1136.
